# Supplementary material for: Improved Equine Fecal Microbiome Characterization Using Target Enrichment by Hybridization Capture
Source: MDPI journal article supplement (doi:10.3390/ani14030445), 2024-01-29
Supplement: s1 [file s1]

**SUPPLEMENTARY MATERIALS**

**Table S1.** Counts of reads, OTUs and Good's coverage index per sample.

|                       | Sample 1  |                    |                  | Sample 2 |                    |                  | Sample 3  |                    |                  | Sample 4  |                    |                  |
|-----------------------|-----------|--------------------|------------------|----------|--------------------|------------------|-----------|--------------------|------------------|-----------|--------------------|------------------|
|                       | TEHC      | TEHC<br>Normalized | 16S-<br>Amplicon | TEHC     | TEHC<br>Normalized | 16S-<br>Amplicon | TEHC      | TEHC<br>Normalized | 16S-<br>Amplicon | TEHC      | TEHC<br>Normalized | 16S-<br>Amplicon |
| Raw reads             | 1,144,928 | -                  | 563,114          | 727,571  | -                  | 564,542          | 1,235,085 | -                  | 508,936          | 1,044,957 | -                  | 697,643          |
| Filtered reads        | 847,125   | 475,231            | 475,231          | 531,323  | 489,748            | 489,748          | 945,679   | 446,346            | 446,346          | 797,226   | 601,577            | 601,577          |
| 16S mapping reads     | -         | 300235             | 323506           | -        | 315252             | 350801           | -         | 316794             | 354840           | -         | 380515             | 389125           |
| % Reads mapped        | -         | 63                 | 68               | -        | 64                 | 72               | -         | 71                 | 79               | -         | 63                 | 65               |
| OTUs                  | -         | 11046              | 4981             | -        | 10058              | 5340             | -         | 9032               | 4036             | -         | 10178              | 4641             |
| Good's coverage index | -         | 0.9932619          | 0.9944545        | -        | 0.9945789          | 0.9944612        | -         | 0.9934879          | 0.995412         | -         | 0.9949805          | 0.9954616        |

| BEI MOCK MICROBIOME   |           |                    |                  |
|-----------------------|-----------|--------------------|------------------|
|                       | TEHC      | TEHC<br>Normalized | 16S-<br>Amplicon |
| Raw reads             | 5,345,638 | -                  | 136,184          |
| Filtered reads        | 4,591,609 | 56,879             | 56,879           |
| 16S mapping reads     | -         | 38,427             | 42,261           |
| % Reads mapped        | -         | 68                 | 74               |
| OTUs                  | -         | 1,940              | 634              |
| Good's coverage index | -         | 99.73857           | 99.29722         |

**Table S2.** Relative abundance (%) of genera identified among the most abundant exclusively with one sequencing strategy.

| <b>Fecal Sample</b> | <b>Genus</b>                 | <b>TEHC</b> | <b>16S-AMP</b> |
|---------------------|------------------------------|-------------|----------------|
| 1                   | <i>Phascolarctobacterium</i> | 0.99        | 1.85           |
|                     | <i>Pseudobutyrvibrio</i>     | 0.72        | 1.55           |
| 2                   | <i>Fibrobacter</i>           | 1.47        | 0.92           |
|                     | BF311                        | 0.77        | 1.62           |
|                     | <i>Solibacillus</i>          | 0.99        | 1.26           |
| 3                   | <i>Blautia</i>               | 1.37        | 0.95           |
|                     | <b><i>Lysinibacillus</i></b> | <b>8.43</b> | <b>0.17</b>    |
|                     | <i>Parabacteroides</i>       | 0.95        | 1.29           |
|                     | <i>Streptococcus</i>         | 1.01        | 0.86           |
|                     | <i>Clostridium</i>           | 1.17        | 0.68           |
| 4                   | <b><i>Lysinibacillus</i></b> | <b>1.45</b> | <b>0.04</b>    |
|                     | <i>Paludibacter</i>          | 0.98        | 1.82           |
|                     | <i>Phascolarctobacterium</i> | 0.95        | 1.46           |
|                     | <i>Wautersiella</i>          | 0.90        | 1.11           |
|                     | YRC22                        | 0.42        | 1.37           |

**Table S3.** Relative abundance (%) of species identified among the most abundant exclusively with one sequencing strategy.

| Fecal Sample | Genus                           | TEHC           | 16S-AMP        |
|--------------|---------------------------------|----------------|----------------|
| 1            | <i>F. succinogenes</i>          | 2.12600        | 2.90505        |
|              | <i>F. succinogenes</i>          | 1.44710        | 0.91590        |
| 2            | <i>C. variabile</i>             | 0.85551        | 1.27850        |
|              | <i>S. luteaciae</i>             | 5.88386        | 6.65819        |
|              | <b><i>L. boronitolerans</i></b> | <b>8.41399</b> | <b>0.17191</b> |
| 3            | <i>B. muralis</i>               | 0.94383        | 1.11318        |
|              | <i>B. uniformis</i>             | 1.40628        | 2.39404        |
| 4            | <i>A. lwoffii</i>               | <b>1.41308</b> | <b>0.00026</b> |
|              | <i>L. boronitolerans</i>        | <b>1.44751</b> | <b>0.00694</b> |

**Table S4.** Relative abundance (%) of expected species identified with 16S-amplicon sequencing and TEHC.

| <b>Species</b>                    | <b>16S-Amplicon</b> | <b>TEHC</b> | <b>Expected</b> |
|-----------------------------------|---------------------|-------------|-----------------|
| <i>Helicobacter pylori</i>        | 12.19               | 5.96        | 5               |
| <i>Neisseria cinerea</i>          | 7.17                | 4.38        | 5               |
| <i>Staphylococcus aureus</i>      | 5.81                | 4.03        | 5               |
| <i>Staphylococcus epidermidis</i> | 4.28                | 2.88        | 5               |
| <i>Propionibacterium acnes</i>    | 0.36                | 3.72        | 5               |
| <i>Rhodobacter sphaeroides</i>    | 2.49                | 2.56        | 5               |
